# Supplementary material for: Enhanced activity of selenocyanate-containing transition metal chalcogenides supported by nitrogen-doped carbon materials for the oxygen reduction reaction
Source: Royal Society of Chemistry journal article supplement (doi:10.1039/c9cy00854c), 2019-01-01
Supplement: c9cy00854c1.pdf [file c9cy00854c1.pdf]

## Supporting Information

### **Enhanced Activity of Selenocyanate-containing Transition Metal Chalcogenides Supported by Nitrogen-doped Carbon Materials for Oxygen Reduction Reaction**

Huan-Ping Jhong,<sup>a,c</sup> Sun-Tang Chang,<sup>a</sup> Hsin-Chih Huang,<sup>a</sup> Kai-Chin Wang,<sup>a</sup> Jyh-Fu Lee,<sup>b</sup> Mikito Yasuzawa,<sup>c</sup> Chen-Hao Wang<sup>a\*</sup>

*a. Department of Materials Science and Engineering, National Taiwan University of Science and Technology, Taipei 10607, Taiwan.*

*b. National Synchrotron Radiation Research Center, Hsinchu 30076, Taiwan.*

*c. University of Tokushima, Tokushima 770-8501, Japan.*

*\*Corresponding author, E-mail: [chwang@mail.ntust.edu.tw](mailto:chwang@mail.ntust.edu.tw)*

*Tel: +886-2-2730-3715; Fax: +886-2-2737-6544*

**Figure S1-S2**

**Table S1-S3**

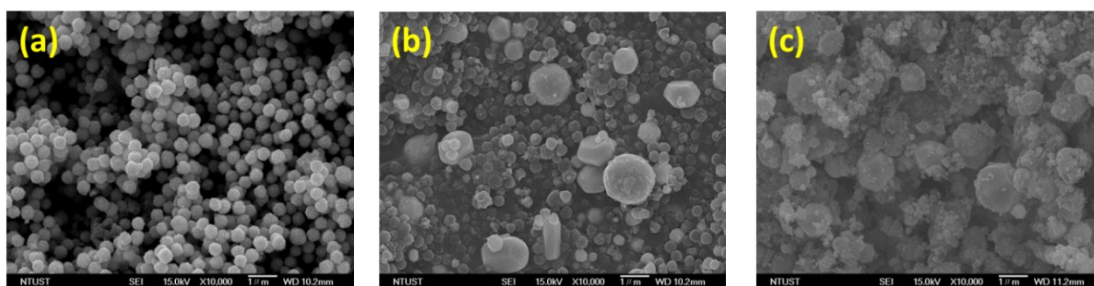

**Figure S1.** SEM images of (a) the as-synthesized  $\text{CoSe}_2$ , (b) the as-synthesized  $\text{CoSe}_2$  after pyrolysis, and (c)  $\text{CoSe/CN}$ .

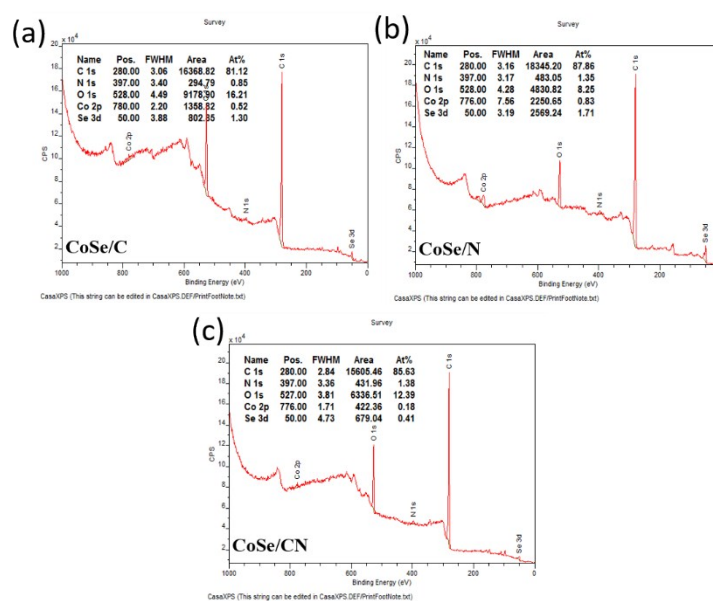

**Figure S2.** XPS surveys of (a)  $\text{CoSe/C}$ , (b)  $\text{CoSe/N}$ , (c) and  $\text{CoSe/CN}$ .

**Table S1.** XRD grain size calculation of  $\text{CoSe/C}$ ,  $\text{CoSe/N}$ , and  $\text{CoSe/CN}$ .

| Sample           | Grain size (nm) |
|------------------|-----------------|
| $\text{CoSe/C}$  | 33.88           |
| $\text{CoSe/N}$  | 46.93           |
| $\text{CoSe/CN}$ | 33.74           |

**Table S2.** SEM-EDX analysis of CoSe/C, CoSe/N, and CoSe/CN.

| Element (At %)/<br>Sample | C     | O    | Co    | Se   |
|---------------------------|-------|------|-------|------|
| CoSe/C                    | 81.03 | 2.48 | 9.09  | 7.39 |
| CoSe/N                    | 78.7  | 4.23 | 10.21 | 6.86 |
| CoSe/CN                   | 75.74 | 4.06 | 12.57 | 7.63 |

**Table S3.** XPS survey ratio calculation of CoSe/C, CoSe/N, and CoSe/CN.

| Element (At %)/<br>Sample | C 1s  | N 1s | O 1s  | Co 2p | Se 3d |
|---------------------------|-------|------|-------|-------|-------|
| CoSe/C                    | 81.12 | 0.85 | 16.21 | 0.52  | 1.3   |
| CoSe/N                    | 87.86 | 1.35 | 8.25  | 0.83  | 1.71  |
| CoSe/CN                   | 85.63 | 1.38 | 12.39 | 0.18  | 0.41  |
